# Supplementary material for: The Distribution of Minerals in Crucial Plant Parts of Various Elderberry (Sambucus spp.) Interspecific Hybrids
Source: MDPI journal article supplement (doi:10.3390/plants10040653), 2021-03-30
Supplement: s1 [file s1]

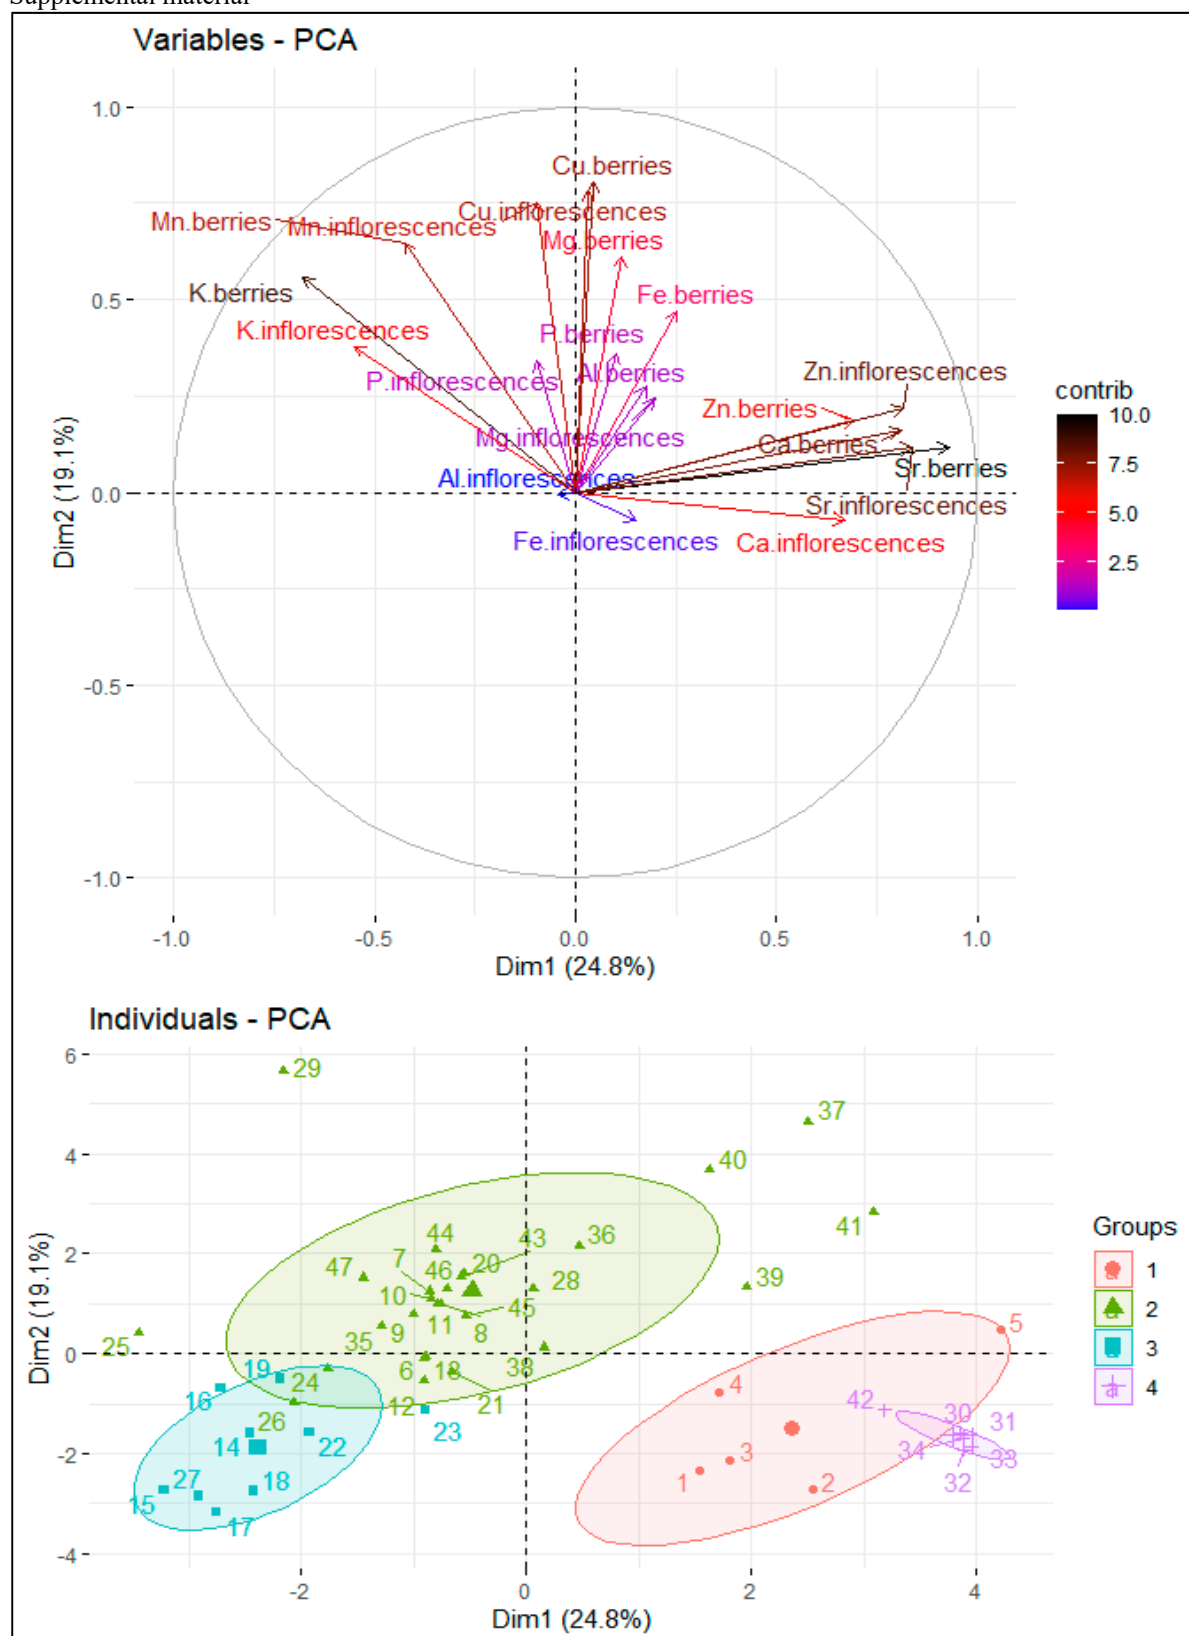

**Supplemental material – Figure 1.** Variable correlation and scores plot of the first two principal components. Ellipses of clusters represent 0.68 normal probability level.

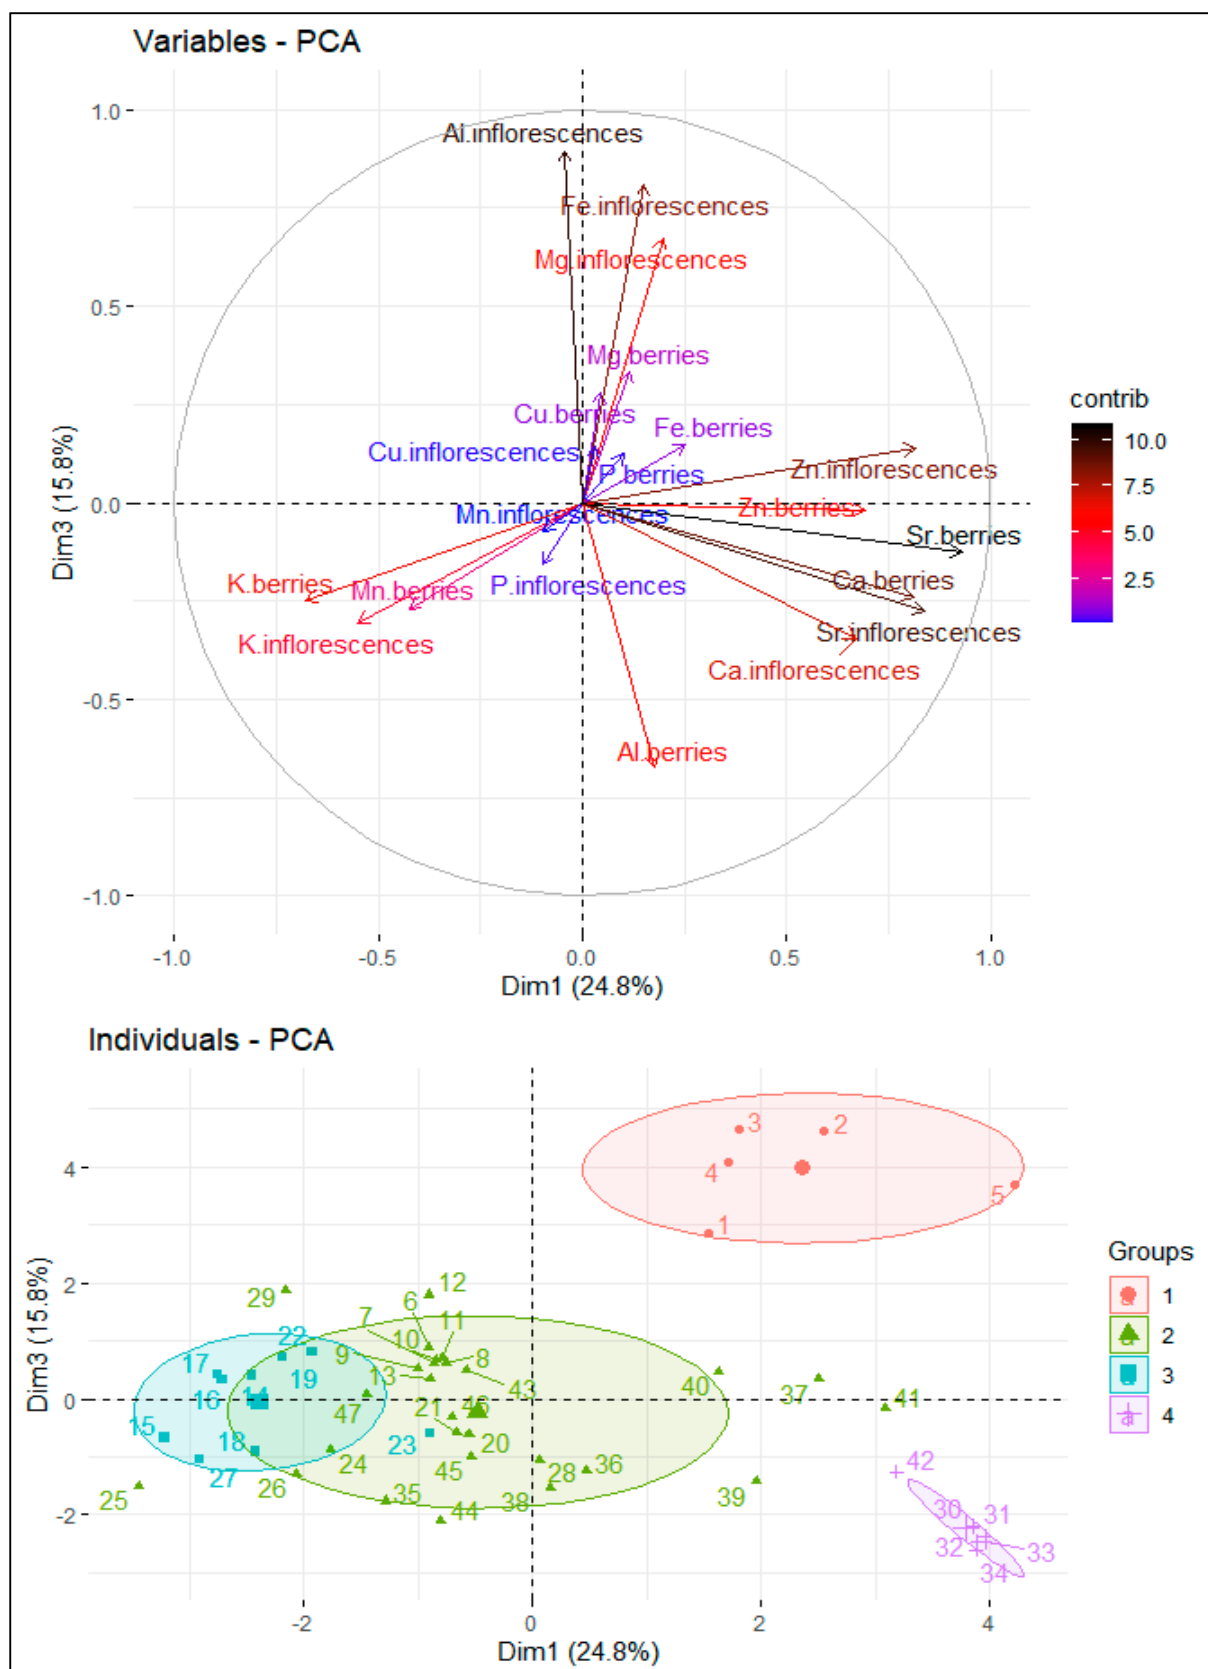

**Supplemental material – Figure 2.** Variable correlation and scores plot of the first and third principal component. Ellipses of clusters represent 0.68 normal probability level.

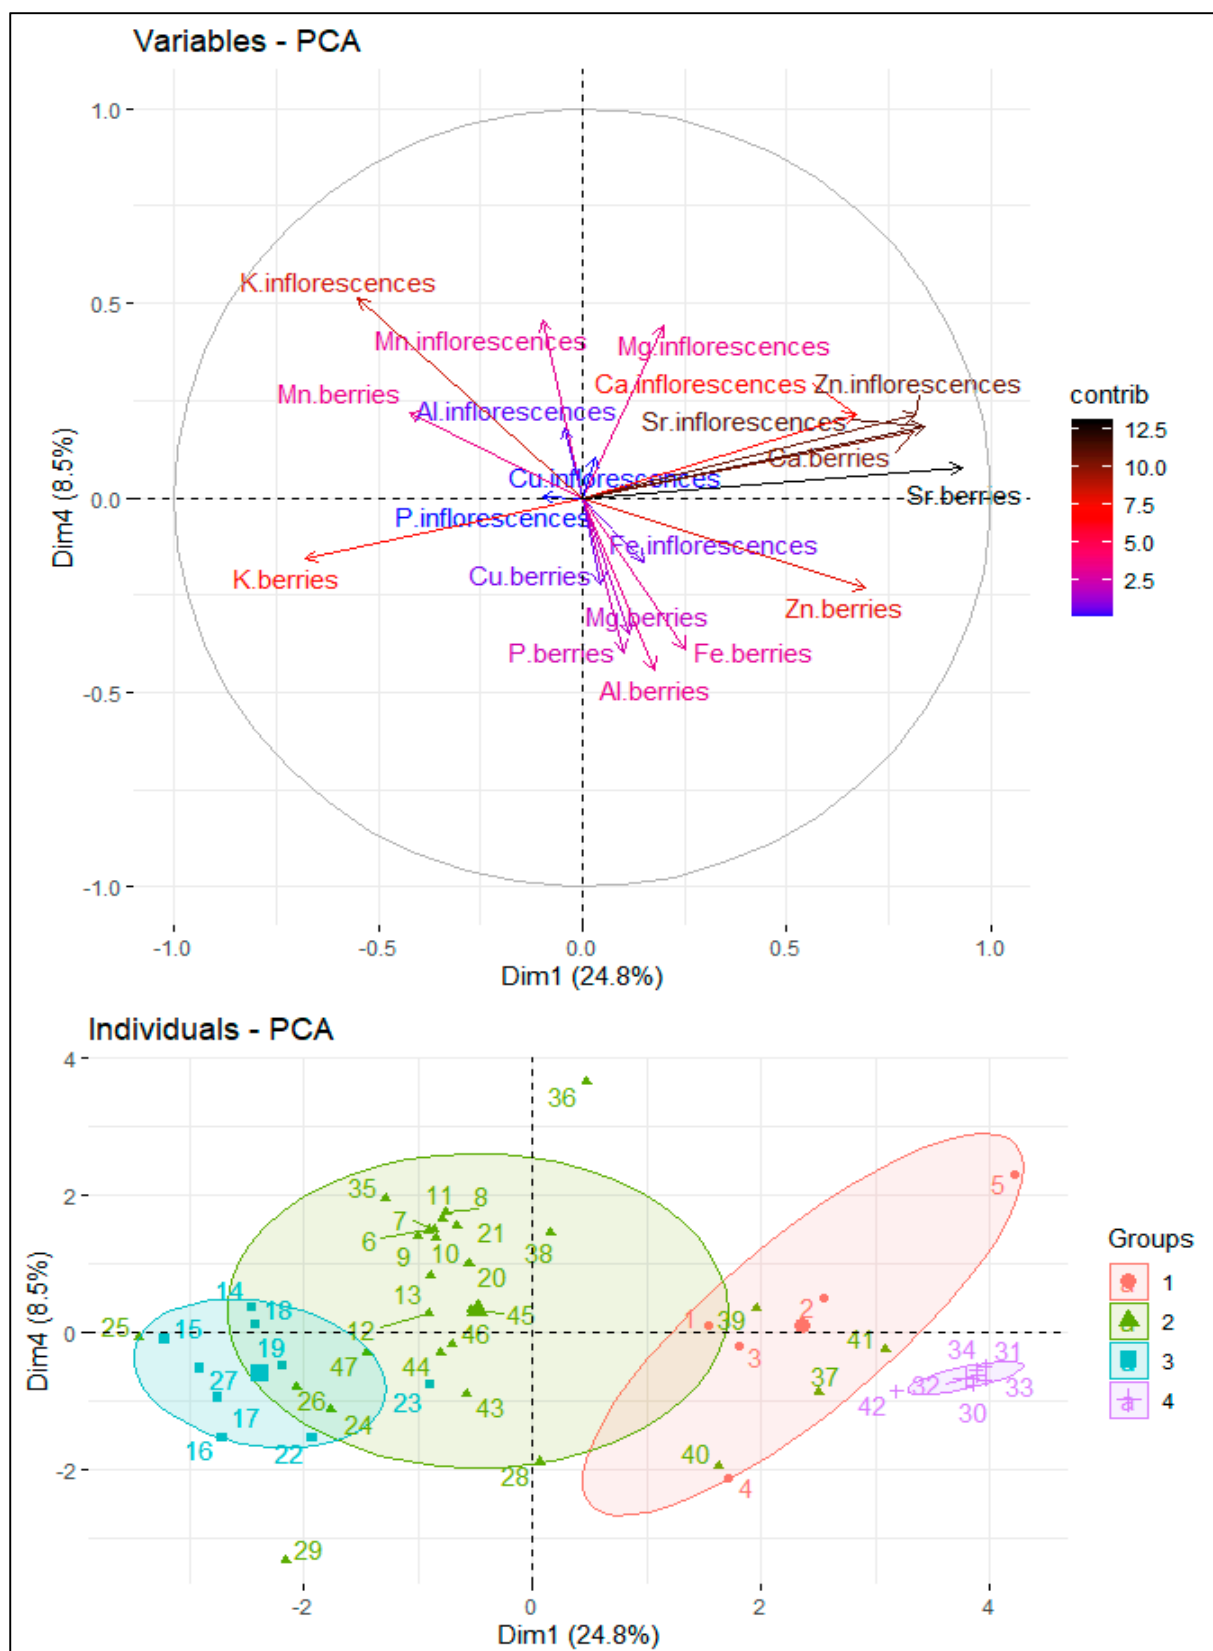

**Supplemental material – Figure 3.** Variable correlation and scores plot of the first and the fourth principal component. Ellipses of clusters represent 0.68 normal probability level.
